# Supplementary material
Source: PubMed Central journal article supplement (PMC4113038)
Supplement: NIHMS589525-supplement-01.pdf [file NIHMS589525-supplement-01.pdf]

**Online Supplemental Figure 1.** Overall, disease-free, local-, regional-, and distant-free recurrence survival for the entire cohort of surgical (N=458) and SBRT(N=151) patients with clinical Stage I NSCLC.

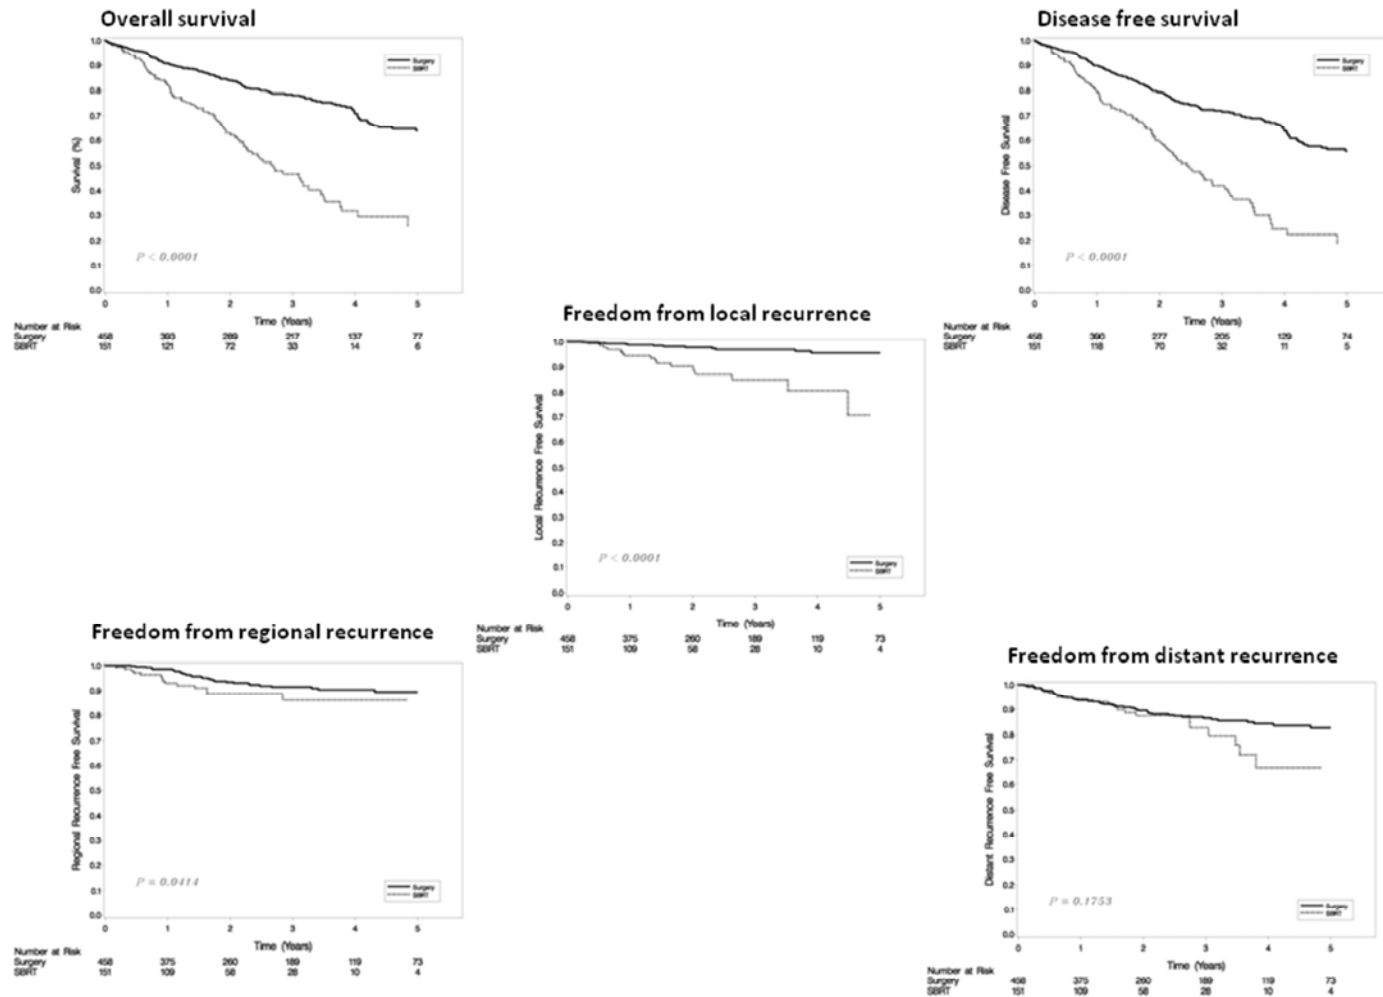

**Online Supplemental Table 1.** Overall, disease-free, local-, regional-, and distant-free recurrence survival for the entire cohort of surgical (N=458) and SBRT(N=151) patients with clinical Stage I NSCLC. Table includes confidence intervals for survival analysis.

1-1A). Median follow-up is 2.42 years.

| From DOS to Follow up or death (years) |      |         |         |        |
|----------------------------------------|------|---------|---------|--------|
| N                                      | Mean | Minimum | Maximum | Median |
| 609                                    | 2.79 | 0.01    | 7.44    | 2.42   |

| From DOS to Follow up or death (years) |     |      |         |         |        |
|----------------------------------------|-----|------|---------|---------|--------|
| Group                                  | N   | Mean | Minimum | Maximum | Median |
| Surgery                                | 458 | 3.00 | 0.01    | 7.44    | 2.83   |
| SBRT                                   | 151 | 2.15 | 0.05    | 6.32    | 1.95   |

1-1B). Overall survival is defined from date of treatment (dos) to death date or the last follow-up.

| Summary of the # of Deaths and # of Patients Alive at Last Follow-up |                  |                |                                 |                                 |
|----------------------------------------------------------------------|------------------|----------------|---------------------------------|---------------------------------|
| Group                                                                | Total # Patients | Total # Deaths | Total # Alive at Last Follow-up | Percent Alive at Last Follow-up |
| SBRT                                                                 | 151              | 81             | 70                              | 46.36                           |
| Surgery                                                              | 458              | 121            | 337                             | 73.58                           |
|                                                                      | 609              | 202            | 407                             | 66.83                           |

1-1C). Overall survival is tabled below:

| Group   | Year | Percent Alive | 95% Confidence Interval |
|---------|------|---------------|-------------------------|
| SBRT    | 1    | 0.82          | (0.75, 0.87)            |
| SBRT    | 3    | 0.47          | (0.37, 0.55)            |
| SBRT    | 5    | 0.25          | (0.14, 0.37)            |
| Surgery | 1    | 0.91          | (0.88, 0.93)            |
| Surgery | 3    | 0.78          | (0.73, 0.82)            |
| Surgery | 5    | 0.64          | (0.58, 0.69)            |

1-2A). Disease free was defined as being alive without disease. The patients with disease or death are counted as disease. DFS (Disease Free Survival) was defined as the time from DOS to date of cancer recurrence, death or last follow-up.

| From DOS to disease/death/Follow up (years) |      |         |         |        |
|---------------------------------------------|------|---------|---------|--------|
| N                                           | Mean | Minimum | Maximum | Median |
| 609                                         | 2.71 | 0.01    | 7.44    | 2.28   |

| From DOS to disease/death/Follow up (years) |     |      |         |         |        |
|---------------------------------------------|-----|------|---------|---------|--------|
| Group                                       | N   | Mean | Minimum | Maximum | Median |
| Surgery                                     | 458 | 2.91 | 0.01    | 7.44    | 2.67   |
| SBRT                                        | 151 | 2.08 | 0.05    | 6.22    | 1.93   |

1-2B).

| Summary of the # of Patients Disease and # of Patients Disease Free at Last Follow-up |                  |                 |                                        |                                        |
|---------------------------------------------------------------------------------------|------------------|-----------------|----------------------------------------|----------------------------------------|
| Group                                                                                 | Total # Patients | Total # Disease | Total # Disease Free at Last Follow-up | Percent Disease Free at Last Follow-up |
| SBRT                                                                                  | 151              | 91              | 60                                     | 39.74                                  |
| Surgery                                                                               | 458              | 154             | 304                                    | 66.38                                  |
|                                                                                       | 609              | 245             | 364                                    | 59.77                                  |

1-2C) Disease free survival (DFS) is tabled below:

| Group   | Year | Percent Disease Free | 95% Confidence Interval |
|---------|------|----------------------|-------------------------|
| SBRT    | 1    | 0.79                 | (0.72, 0.85)            |
| SBRT    | 3    | 0.42                 | (0.33, 0.51)            |
| SBRT    | 5    | 0.19                 | (0.10, 0.30)            |
| Surgery | 1    | 0.90                 | (0.87, 0.92)            |
| Surgery | 3    | 0.72                 | (0.67, 0.76)            |
| Surgery | 5    | 0.56                 | (0.49, 0.61)            |

1-3A). Local recurrence is defined as having local recurrence or censored at any other recurrences or the last follow-up. Local recurrence free survival is defined as the time from DOS to date of recurrence or last follow-up.

| From DOS to local recurrence/Follow up (years) |      |         |         |        |
|------------------------------------------------|------|---------|---------|--------|
| N                                              | Mean | Minimum | Maximum | Median |
| 609                                            | 2.56 | 0.01    | 7.44    | 2.08   |

| From DOS to local recurrence/Follow up (years) |     |      |         |         |        |
|------------------------------------------------|-----|------|---------|---------|--------|
| Group                                          | N   | Mean | Minimum | Maximum | Median |
| Surgery                                        | 458 | 2.78 | 0.01    | 7.44    | 2.31   |
| SBRT                                           | 151 | 1.92 | 0.05    | 6.22    | 1.73   |

For the patients who have local recurrence only,

| From DOS to local recurrence (years) |  |    |      |         |         |        |
|--------------------------------------|--|----|------|---------|---------|--------|
| group                                |  | N  | Mean | Minimum | Maximum | Median |
| Surgery                              |  | 12 | 1.69 | 0.24    | 3.90    | 1.45   |
| SBRT                                 |  | 16 | 1.57 | 0.30    | 4.48    | 1.37   |

1-3B).

| Summary of the # of Patients Local Recurrence and # of Patients Local Recurrence Free at Last Follow-up |                  |                          |                                                 |                                                 |
|---------------------------------------------------------------------------------------------------------|------------------|--------------------------|-------------------------------------------------|-------------------------------------------------|
| Group                                                                                                   | Total # Patients | Total # Local Recurrence | Total # Local Recurrence Free at Last Follow-up | Percent Local Recurrence Free at Last Follow-up |
| SBRT                                                                                                    | 150              | 16                       | 134                                             | 89.33                                           |
| Surgery                                                                                                 | 458              | 12                       | 446                                             | 97.38                                           |
|                                                                                                         | 608              | 28                       | 580                                             | 95.39                                           |

1-3C).

| Group | Year | Percent Local Recurrence Free | 95% Confidence Interval |
|-------|------|-------------------------------|-------------------------|
| SBRT  | 1    | 0.94                          | (0.89, 0.97)            |
| SBRT  | 3    | 0.85                          | (0.75, 0.91)            |
| SBRT  | 5    | 0.71                          | (0.44, 0.86)            |

| Group   | Year | Percent Local Recurrence Free | 95% Confidence Interval |
|---------|------|-------------------------------|-------------------------|
| Surgery | 1    | 0.99                          | (0.97, 0.99)            |
| Surgery | 3    | 0.97                          | (0.94, 0.98)            |
| Surgery | 5    | 0.96                          | (0.92, 0.98)            |

1-4A). Regional recurrence is defined as having regional recurrence or censored at any other recurrences or the last follow-up. Regional recurrence free survival is defined as the time from DOS to date of recurrence or last follow-up.

For the patients who have local recurrence only,

| From DOS to regional recurrence (years) |  |    |      |         |         |        |
|-----------------------------------------|--|----|------|---------|---------|--------|
| group                                   |  | N  | Mean | Minimum | Maximum | Median |
| Surgery                                 |  | 32 | 1.77 | 0.41    | 5.95    | 1.46   |
| SBRT                                    |  | 15 | 1.37 | 0.18    | 6.22    | 0.92   |

1-4B).

| Summary of the # of Patients Regional Recurrence and # of Patients Regional Recurrence Free at Last Follow-up |                  |                             |                                                    |                                                    |
|---------------------------------------------------------------------------------------------------------------|------------------|-----------------------------|----------------------------------------------------|----------------------------------------------------|
| Group                                                                                                         | Total # Patients | Total # Regional Recurrence | Total # Regional Recurrence Free at Last Follow-up | Percent Regional Recurrence Free at Last Follow-up |
| SBRT                                                                                                          | 150              | 15                          | 135                                                | 90.00                                              |
| Surgery                                                                                                       | 458              | 32                          | 426                                                | 93.01                                              |
|                                                                                                               | 608              | 47                          | 561                                                | 92.27                                              |

1-4C).

| Group   | Year | Percent Regional Recurrence Free | 95% Confidence Interval |
|---------|------|----------------------------------|-------------------------|
| SBRT    | 1    | 0.93                             | (0.87, 0.96)            |
| SBRT    | 3    | 0.86                             | (0.76, 0.92)            |
| SBRT    | 5    | 0.86                             | (0.76, 0.92)            |
| Surgery | 1    | 0.99                             | (0.97, 0.99)            |
| Surgery | 3    | 0.91                             | (0.88, 0.94)            |
| Surgery | 5    | 0.89                             | (0.85, 0.93)            |

1-5A). Distant recurrence is defined as having distant recurrence or censored at any other recurrences or the last follow-up. Distant recurrence free survival is defined as the time from DOS to date of recurrence or last follow-up.

For the patients who have distant recurrence only,

| From DOS to distant recurrence (years) |  |    |      |         |         |        |
|----------------------------------------|--|----|------|---------|---------|--------|
| group                                  |  | N  | Mean | Minimum | Maximum | Median |
| Surgery                                |  | 58 | 1.64 | 0.09    | 6.50    | 1.24   |
| SBRT                                   |  | 20 | 1.63 | 0.23    | 3.80    | 1.49   |

1-5B).

| Summary of the # of Patients Distant Recurrence and # of Patients Distant Recurrence Free at Last Follow-up |                  |                            |                                                   |                                                   |
|-------------------------------------------------------------------------------------------------------------|------------------|----------------------------|---------------------------------------------------|---------------------------------------------------|
| Group                                                                                                       | Total # Patients | Total # Distant Recurrence | Total # Distant Recurrence Free at Last Follow-up | Percent Distant Recurrence Free at Last Follow-up |
| SBRT                                                                                                        | 150              | 20                         | 130                                               | 86.67                                             |
| Surgery                                                                                                     | 458              | 58                         | 400                                               | 87.34                                             |
|                                                                                                             | 608              | 78                         | 530                                               | 87.17                                             |

1-5C).

| Group   | Year | Percent Distant Recurrence Free | 95% Confidence Interval |
|---------|------|---------------------------------|-------------------------|
| SBRT    | 1    | 0.94                            | (0.88, 0.97)            |
| SBRT    | 3    | 0.83                            | (0.72, 0.90)            |
| SBRT    | 5    | 0.66                            | (0.47, 0.80)            |
| Surgery | 1    | 0.94                            | (0.91, 0.96)            |
| Surgery | 3    | 0.86                            | (0.82, 0.90)            |
| Surgery | 5    | 0.83                            | (0.77, 0.87)            |

**Online Supplemental Figure 2.** Survival for Entire Cohort of SBRT Patients Treated with vs. without a Tissue Diagnosis of NSCLC.

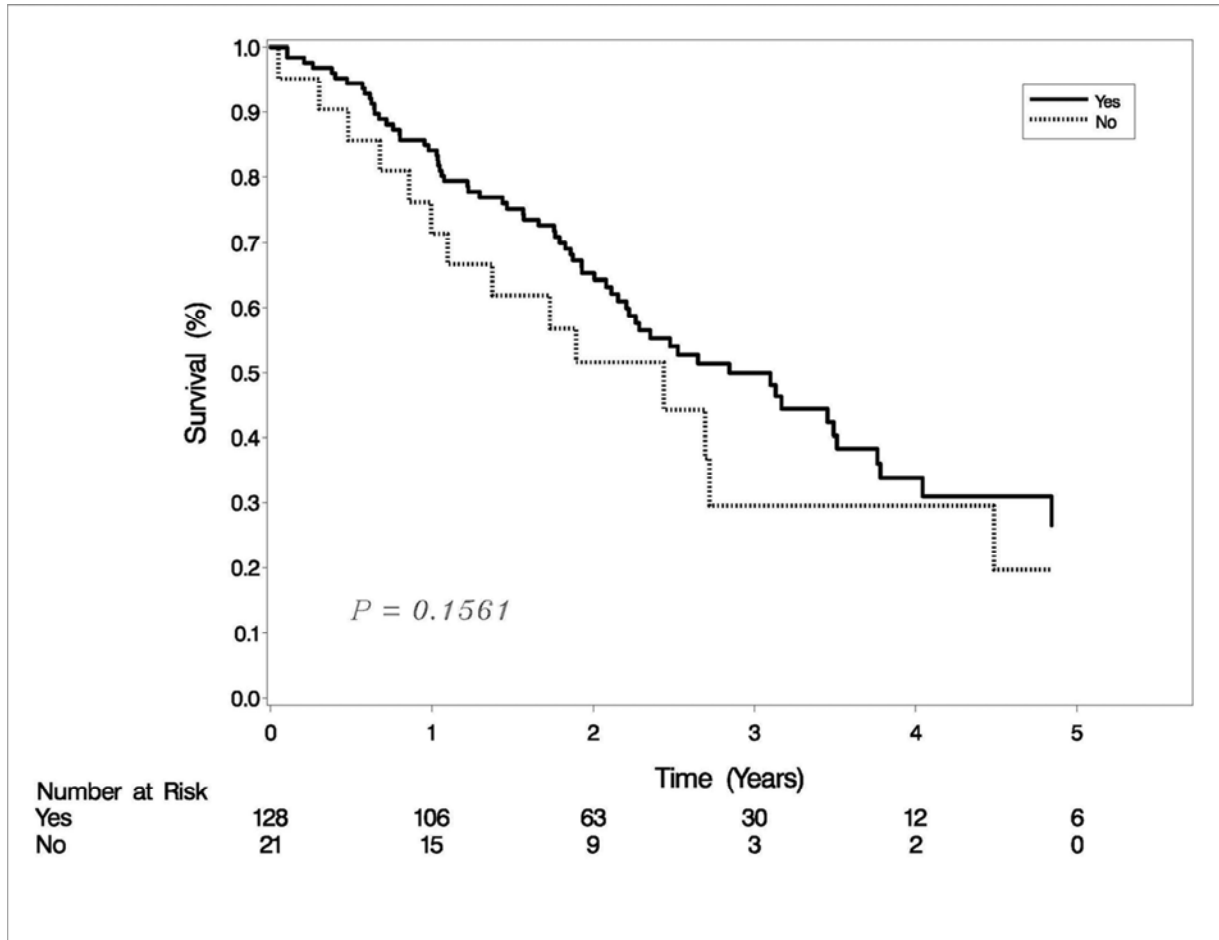

**Online Supplemental Figure 3.** Overall, disease-free, local-, regional-, and distant-free recurrence survival for the initial propensity matched comparison based on age, tumor stage, and ACE comorbidity score in patients undergoing surgery (N=83) vs. SBRT(N=83) for clinical Stage I NSCLC.

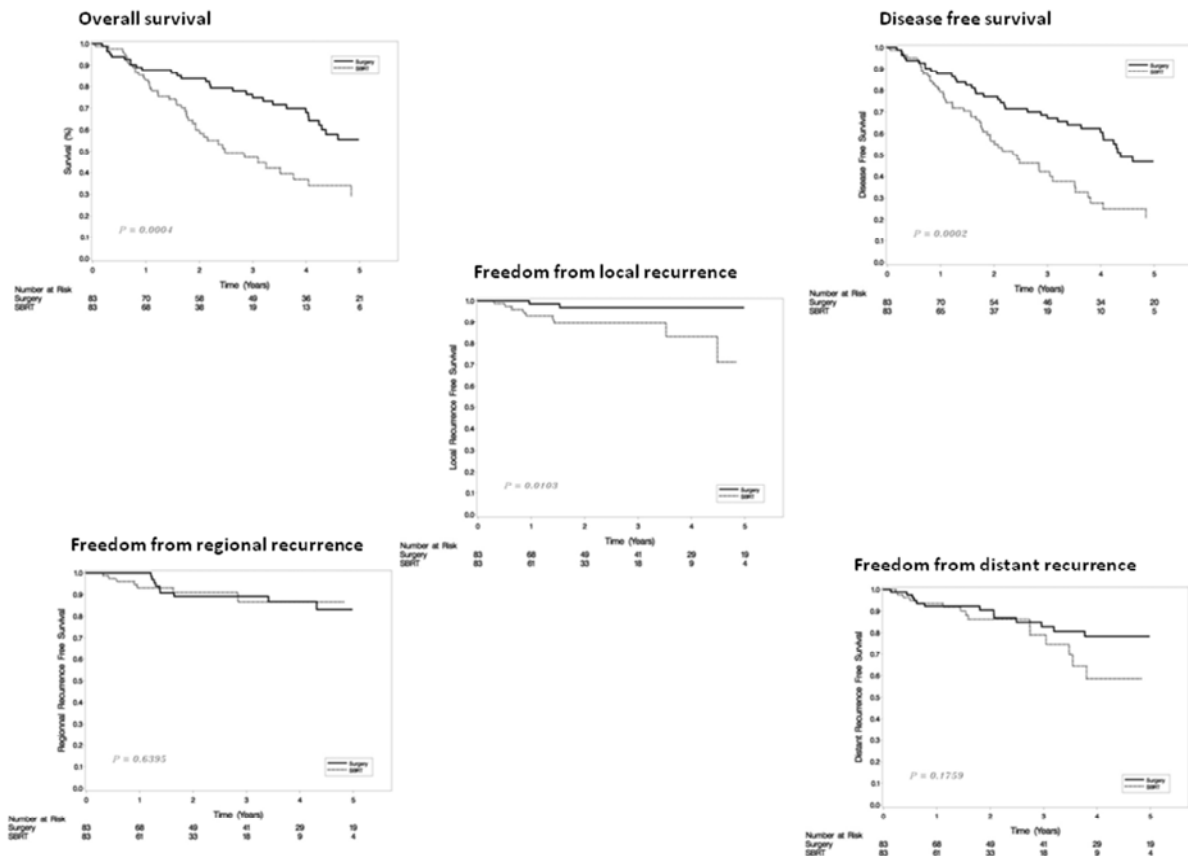



**Online Supplemental Table 3.** Overall, disease-free, local-, regional-, and distant-free recurrence survival for the initial propensity matched comparison based on age, tumor stage, and ACE comorbidity score in patients undergoing surgery (N=83) vs. SBRT(N=83) for clinical Stage I NSCLC. Tables include confidence intervals for survival analysis.

For the matched patients,  
3-1A). Median follow-up is 2.34 years.

| From DOS to Follow up or death (years) |      |         |         |        |
|----------------------------------------|------|---------|---------|--------|
| N                                      | Mean | Minimum | Maximum | Median |
| 166                                    | 2.86 | 0.05    | 7.18    | 2.34   |

| From DOS to Follow up or death (years) |    |      |         |         |        |
|----------------------------------------|----|------|---------|---------|--------|
| Group                                  | N  | Mean | Minimum | Maximum | Median |
| Surgery                                | 83 | 3.43 | 0.08    | 7.18    | 3.58   |
| SBRT                                   | 83 | 2.28 | 0.05    | 6.32    | 1.91   |

3-1B). Overall survival is defined from date of treatment (dos) to death date or the last follow-up.

| Summary of the # of Deaths and # of Patients Alive at Last Follow-up |                  |                |                                 |                                 |
|----------------------------------------------------------------------|------------------|----------------|---------------------------------|---------------------------------|
| Group                                                                | Total # Patients | Total # Deaths | Total # Alive at Last Follow-up | Percent Alive at Last Follow-up |
| SBRT                                                                 | 83               | 45             | 38                              | 45.78                           |
| Surgery                                                              | 83               | 31             | 52                              | 62.65                           |
|                                                                      | 166              | 76             | 90                              | 54.22                           |

3-1C). Overall survival is tabled below:

| Group   | Year | Percent Alive | 95% Confidence Interval |
|---------|------|---------------|-------------------------|
| SBRT    | 1    | 0.83          | (0.73, 0.90)            |
| SBRT    | 3    | 0.47          | (0.35, 0.59)            |
| SBRT    | 5    | 0.29          | (0.16, 0.44)            |
| Surgery | 1    | 0.88          | (0.78, 0.93)            |

| Group   | Year | Percent Alive | 95% Confidence Interval |
|---------|------|---------------|-------------------------|
| Surgery | 3    | 0.75          | (0.63, 0.83)            |
| Surgery | 5    | 0.55          | (0.42, 0.67)            |

3-2A). Disease free was defined as being alive without disease. The patients with disease or death are counted as disease. DFS (Disease Free Survival) was defined as the time from DOS to date of cancer recurrence, death or last follow-up.

| From DOS to disease/death/Follow up (years) |      |         |         |        |
|---------------------------------------------|------|---------|---------|--------|
| N                                           | Mean | Minimum | Maximum | Median |
| 166                                         | 2.74 | 0.05    | 7.18    | 2.20   |

| From DOS to disease/death/Follow up (years) |    |      |         |         |        |
|---------------------------------------------|----|------|---------|---------|--------|
| Group                                       | N  | Mean | Minimum | Maximum | Median |
| Surgery                                     | 83 | 3.30 | 0.08    | 7.18    | 3.38   |
| SBRT                                        | 83 | 2.17 | 0.05    | 6.22    | 1.89   |

3-2B).

| Summary of the # of Patients Disease and # of Patients Disease Free at Last Follow-up |                  |                 |                                        |                                        |
|---------------------------------------------------------------------------------------|------------------|-----------------|----------------------------------------|----------------------------------------|
| Group                                                                                 | Total # Patients | Total # Disease | Total # Disease Free at Last Follow-up | Percent Disease Free at Last Follow-up |
| SBRT                                                                                  | 83               | 52              | 31                                     | 37.35                                  |
| Surgery                                                                               | 83               | 38              | 45                                     | 54.22                                  |
|                                                                                       | 166              | 90              | 76                                     | 45.78                                  |

3-2C) Disease free survival (DFS) is tabled below:

| Group   | Year | Percent Disease Free | 95% Confidence Interval |
|---------|------|----------------------|-------------------------|
| SBRT    | 1    | 0.79                 | (0.69, 0.87)            |
| SBRT    | 3    | 0.42                 | (0.30, 0.54)            |
| SBRT    | 5    | 0.21                 | (0.10, 0.34)            |
| Surgery | 1    | 0.88                 | (0.78, 0.93)            |

| Group   | Year | Percent Disease Free | 95% Confidence Interval |
|---------|------|----------------------|-------------------------|
| Surgery | 3    | 0.67                 | (0.55, 0.76)            |
| Surgery | 5    | 0.47                 | (0.34, 0.59)            |

3-3A). Local recurrence is defined as having local recurrence or censored at any other recurrences or the last follow-up. Local recurrence free survival is defined as the time from DOS to date of recurrence or last follow-up.

| From DOS to local recurrence/Follow up (years) |      |         |         |        |
|------------------------------------------------|------|---------|---------|--------|
| N                                              | Mean | Minimum | Maximum | Median |
| 166                                            | 2.56 | 0.05    | 7.18    | 1.98   |

| From DOS to local recurrence/Follow up (years) |    |      |         |         |        |
|------------------------------------------------|----|------|---------|---------|--------|
| Group                                          | N  | Mean | Minimum | Maximum | Median |
| Surgery                                        | 83 | 3.07 | 0.08    | 7.18    | 2.96   |
| SBRT                                           | 83 | 2.05 | 0.05    | 6.22    | 1.73   |

For the patients who have local recurrence only,

| From DOS to local recurrence (years) |  |   |      |         |         |        |
|--------------------------------------|--|---|------|---------|---------|--------|
| group                                |  | N | Mean | Minimum | Maximum | Median |
| Surgery                              |  | 2 | 1.25 | 0.96    | 1.53    | 1.25   |
| SBRT                                 |  | 9 | 1.56 | 0.30    | 4.48    | 0.90   |

3-3B).

| Summary of the # of Patients Local Recurrence and # of Patients Local Recurrence Free at Last Follow-up |                  |                          |                                                 |                                                 |
|---------------------------------------------------------------------------------------------------------|------------------|--------------------------|-------------------------------------------------|-------------------------------------------------|
| Group                                                                                                   | Total # Patients | Total # Local Recurrence | Total # Local Recurrence Free at Last Follow-up | Percent Local Recurrence Free at Last Follow-up |
| SBRT                                                                                                    | 83               | 9                        | 74                                              | 89.16                                           |
| Surgery                                                                                                 | 83               | 2                        | 81                                              | 97.59                                           |
|                                                                                                         | 166              | 11                       | 155                                             | 93.37                                           |

3-3C).

| Group   | Year | Percent Local Recurrence Free | 95% Confidence Interval |
|---------|------|-------------------------------|-------------------------|
| SBRT    | 1    | 0.93                          | (0.84, 0.97)            |
| SBRT    | 3    | 0.90                          | (0.79, 0.95)            |
| SBRT    | 5    | 0.71                          | (0.39, 0.88)            |
| Surgery | 1    | 0.99                          | (0.90, 0.998)           |
| Surgery | 3    | 0.97                          | (0.88, 0.99)            |
| Surgery | 5    | 0.97                          | (0.88, 0.99)            |

3-4A). Regional recurrence is defined as having regional recurrence or censored at any other recurrences or the last follow-up. Regional recurrence free survival is defined as the time from DOS to date of recurrence or last follow-up.

For the patients who have local recurrence only,

| From DOS to regional recurrence (years) |  |   |      |         |         |        |
|-----------------------------------------|--|---|------|---------|---------|--------|
| group                                   |  | N | Mean | Minimum | Maximum | Median |
| Surgery                                 |  | 9 | 1.91 | 1.21    | 4.31    | 1.37   |
| SBRT                                    |  | 8 | 1.73 | 0.32    | 6.22    | 0.93   |

3-4B).

| Summary of the # of Patients Regional Recurrence and # of Patients Regional Recurrence Free at Last Follow-up |                  |                             |                                                    |                                                    |
|---------------------------------------------------------------------------------------------------------------|------------------|-----------------------------|----------------------------------------------------|----------------------------------------------------|
| Group                                                                                                         | Total # Patients | Total # Regional Recurrence | Total # Regional Recurrence Free at Last Follow-up | Percent Regional Recurrence Free at Last Follow-up |
| SBRT                                                                                                          | 83               | 8                           | 75                                                 | 90.36                                              |
| Surgery                                                                                                       | 83               | 9                           | 74                                                 | 89.16                                              |
|                                                                                                               | 166              | 17                          | 149                                                | 89.76                                              |

3-4C).

| Group | Year | Percent Regional Recurrence Free | 95% Confidence Interval |
|-------|------|----------------------------------|-------------------------|
| SBRT  | 1    | 0.93                             | (0.84, 0.97)            |
| SBRT  | 3    | 0.87                             | (0.71, 0.94)            |
| SBRT  | 5    | 0.87                             | (0.71, 0.94)            |

| Group   | Year | Percent Regional Recurrence Free | 95% Confidence Interval |
|---------|------|----------------------------------|-------------------------|
| Surgery | 1    | 1.00                             |                         |
| Surgery | 3    | 0.89                             | (0.79, 0.95)            |
| Surgery | 5    | 0.83                             | (0.69, 0.91)            |

3-5A). Distant recurrence is defined as having distant recurrence or censored at any other recurrences or the last follow-up. Distant recurrence free survival is defined as the time from DOS to date of recurrence or last follow-up.

For the patients who have distant recurrence only,

| From DOS to distant recurrence (years) |  |    |      |         |         |        |
|----------------------------------------|--|----|------|---------|---------|--------|
| group                                  |  | N  | Mean | Minimum | Maximum | Median |
| Surgery                                |  | 13 | 1.65 | 0.14    | 3.77    | 1.80   |
| SBRT                                   |  | 15 | 1.80 | 0.23    | 3.80    | 1.55   |

3-5B).

| Summary of the # of Patients Distant Recurrence and # of Patients Distant Recurrence Free at Last Follow-up |                  |                            |                                                   |                                                   |
|-------------------------------------------------------------------------------------------------------------|------------------|----------------------------|---------------------------------------------------|---------------------------------------------------|
| Group                                                                                                       | Total # Patients | Total # Distant Recurrence | Total # Distant Recurrence Free at Last Follow-up | Percent Distant Recurrence Free at Last Follow-up |
| SBRT                                                                                                        | 83               | 15                         | 68                                                | 81.93                                             |
| Surgery                                                                                                     | 83               | 13                         | 70                                                | 84.34                                             |
|                                                                                                             | 166              | 28                         | 138                                               | 83.13                                             |

3-5C).

| Group   | Year | Percent Distant Recurrence Free | 95% Confidence Interval |
|---------|------|---------------------------------|-------------------------|
| SBRT    | 1    | 0.94                            | (0.85, 0.97)            |
| SBRT    | 3    | 0.79                            | (0.63, 0.89)            |
| SBRT    | 5    | 0.58                            | (0.36, 0.75)            |
| Surgery | 1    | 0.92                            | (0.84, 0.96)            |
| Surgery | 3    | 0.83                            | (0.71, 0.90)            |
| Surgery | 5    | 0.78                            | (0.65, 0.87)            |

**Online Supplemental Table 4.** Overall, disease-free, local-, regional-, and distant-free recurrence survival for the final propensity matched comparison based on age, tumor size, ACE comorbidity score, tumor location (central vs. peripheral), and FEV1% in patients undergoing surgery (N=56) vs. SBRT(N=56) for clinical Stage I NSCLC. Tables include confidence intervals for survival analysis.

For the matched patients,

4-1A). Median follow-up is 2.19 years.

| From DOS to Follow up or death (years) |      |         |         |        |
|----------------------------------------|------|---------|---------|--------|
| N                                      | Mean | Minimum | Maximum | Median |
| 112                                    | 2.95 | 0.09    | 7.44    | 2.19   |

| From DOS to Follow up or death (years) |    |      |         |         |        |
|----------------------------------------|----|------|---------|---------|--------|
| Group                                  | N  | Mean | Minimum | Maximum | Median |
| Surgery                                | 56 | 3.77 | 0.09    | 7.44    | 4.16   |
| SBRT                                   | 56 | 2.13 | 0.26    | 6.04    | 1.88   |

4-1B). Overall survival is defined from date of treatment (dos) to death date or the last follow-up.

| Summary of the # of Deaths and # of Patients Alive at Last Follow-up |                  |                |                                 |                                 |
|----------------------------------------------------------------------|------------------|----------------|---------------------------------|---------------------------------|
| Group                                                                | Total # Patients | Total # Deaths | Total # Alive at Last Follow-up | Percent Alive at Last Follow-up |
| SBRT                                                                 | 56               | 26             | 30                              | 53.57                           |
| Surgery                                                              | 56               | 24             | 32                              | 57.14                           |
|                                                                      | 112              | 50             | 62                              | 55.36                           |

4-1C). Overall survival is tabled below:

| Group | Year | Percent Alive | 95% Confidence Interval |         |
|-------|------|---------------|-------------------------|---------|
| SBRT  | 1    | 0.83854       | 0.71263                 | 0.91254 |
| SBRT  | 2    | 0.58311       | 0.43116                 | 0.70764 |
| SBRT  | 3    | 0.51629       | 0.35691                 | 0.65430 |
| SBRT  | 4    | 0.46466       | 0.29405                 | 0.61883 |
| SBRT  | 5    | 0.38722       | 0.19820                 | 0.57340 |

| Group   | Year | Percent Alive | 95% Confidence Interval |         |
|---------|------|---------------|-------------------------|---------|
| Surgery | 1    | 0.83636       | 0.70912                 | 0.91129 |
| Surgery | 2    | 0.74132       | 0.60220                 | 0.83807 |
| Surgery | 3    | 0.67650       | 0.53069                 | 0.78578 |
| Surgery | 4    | 0.67650       | 0.53069                 | 0.78578 |
| Surgery | 5    | 0.58678       | 0.43679                 | 0.70956 |

4-2A). Disease free was defined as being alive without disease. The patients with disease or death are counted as disease. DFS (Disease Free Survival) was defined as the time from DOS to date of cancer recurrence, death or last follow-up.

| From DOS to disease/death/Follow up (years) |      |         |         |        |
|---------------------------------------------|------|---------|---------|--------|
| N                                           | Mean | Minimum | Maximum | Median |
| 112                                         | 2.89 | 0.09    | 7.44    | 2.14   |

| From DOS to disease/death/Follow up (years) |    |      |         |         |        |
|---------------------------------------------|----|------|---------|---------|--------|
| Group                                       | N  | Mean | Minimum | Maximum | Median |
| Surgery                                     | 56 | 3.74 | 0.09    | 7.44    | 4.08   |
| SBRT                                        | 56 | 2.04 | 0.26    | 6.04    | 1.82   |

4-2B).

| Summary of the # of Patients Disease and # of Patients Disease Free at Last Follow-up |                  |                 |                                        |                                        |
|---------------------------------------------------------------------------------------|------------------|-----------------|----------------------------------------|----------------------------------------|
| Group                                                                                 | Total # Patients | Total # Disease | Total # Disease Free at Last Follow-up | Percent Disease Free at Last Follow-up |
| SBRT                                                                                  | 56               | 30              | 26                                     | 46.43                                  |
| Surgery                                                                               | 56               | 25              | 31                                     | 55.36                                  |
|                                                                                       | 112              | 55              | 57                                     | 50.89                                  |

4-2C) Disease free survival (DFS) is tabled below:

| Group | Year | Percent Disease Free | 95% Confidence Interval |         |
|-------|------|----------------------|-------------------------|---------|
| SBRT  | 1    | 0.78571              | 0.65362                 | 0.87217 |

| Group   | Year | Percent Disease Free | 95% Confidence Interval |         |
|---------|------|----------------------|-------------------------|---------|
| SBRT    | 2    | 0.53660              | 0.38889                 | 0.66345 |
| SBRT    | 3    | 0.47137              | 0.31835                 | 0.61005 |
| SBRT    | 4    | 0.37710              | 0.21541                 | 0.53819 |
| SBRT    | 5    | 0.30168              | 0.13331                 | 0.49032 |
| Surgery | 1    | 0.83636              | 0.70912                 | 0.91129 |
| Surgery | 2    | 0.74132              | 0.60220                 | 0.83807 |
| Surgery | 3    | 0.65468              | 0.50745                 | 0.76756 |
| Surgery | 4    | 0.65468              | 0.50745                 | 0.76756 |
| Surgery | 5    | 0.56577              | 0.41620                 | 0.69068 |

4-3A). Local recurrence is defined as having local recurrence or censored at any other recurrences or the last follow-up. Local recurrence free survival is defined as the time from DOS to date of recurrence or last follow-up.

| From DOS to local recurrence/Follow up (years) |      |         |         |        |
|------------------------------------------------|------|---------|---------|--------|
| N                                              | Mean | Minimum | Maximum | Median |
| 112                                            | 2.78 | 0.09    | 7.44    | 2.14   |

| From DOS to local recurrence/Follow up (years) |    |      |         |         |        |
|------------------------------------------------|----|------|---------|---------|--------|
| Group                                          | N  | Mean | Minimum | Maximum | Median |
| Surgery                                        | 56 | 3.62 | 0.09    | 7.44    | 3.54   |
| SBRT                                           | 56 | 1.95 | 0.23    | 6.04    | 1.60   |

For the patients who have local recurrence only,

| From DOS to local recurrence (years) |  |   |      |         |         |        |
|--------------------------------------|--|---|------|---------|---------|--------|
| group                                |  | N | Mean | Minimum | Maximum | Median |
| Surgery                              |  | 3 | 1.73 | 0.50    | 2.37    | 2.31   |
| SBRT                                 |  | 6 | 1.95 | 0.51    | 4.48    | 1.16   |



4-3B).

| <b>Summary of the # of Patients Local Recurrence and # of Patients Local Recurrence Free at Last Follow-up</b> |                         |                                 |                                                        |                                                        |
|----------------------------------------------------------------------------------------------------------------|-------------------------|---------------------------------|--------------------------------------------------------|--------------------------------------------------------|
| <b>Group</b>                                                                                                   | <b>Total # Patients</b> | <b>Total # Local Recurrence</b> | <b>Total # Local Recurrence Free at Last Follow-up</b> | <b>Percent Local Recurrence Free at Last Follow-up</b> |
| SBRT                                                                                                           | 56                      | 6                               | 50                                                     | 89.29                                                  |
| Surgery                                                                                                        | 56                      | 3                               | 53                                                     | 94.64                                                  |
|                                                                                                                | 112                     | 9                               | 103                                                    | 91.96                                                  |

4-3C).

| <b>Group</b> | <b>Year</b> | <b>Percent Local Recurrence Free</b> | <b>95% Confidence Interval</b> |         |
|--------------|-------------|--------------------------------------|--------------------------------|---------|
| SBRT         | 1           | 0.93830                              | 0.82069                        | 0.97968 |
| SBRT         | 2           | 0.90986                              | 0.77449                        | 0.96569 |
| SBRT         | 3           | 0.90986                              | 0.77449                        | 0.96569 |
| SBRT         | 4           | 0.80877                              | 0.50295                        | 0.93656 |
| SBRT         | 5           | 0.40438                              | 0.01373                        | 0.82601 |
| Surgery      | 1           | 0.98077                              | 0.87123                        | 0.99727 |
| Surgery      | 2           | 0.98077                              | 0.87123                        | 0.99727 |
| Surgery      | 3           | 0.92133                              | 0.77097                        | 0.97452 |
| Surgery      | 4           | 0.92133                              | 0.77097                        | 0.97452 |
| Surgery      | 5           | 0.92133                              | 0.77097                        | 0.97452 |

4-4A). Regional recurrence is defined as having regional recurrence or censored at any other recurrences or the last follow-up. Regional recurrence free survival is defined as the time from DOS to date of recurrence or last follow-up.

For the patients who have local recurrence only,

| <b>From DOS to regional recurrence (years)</b> |          |             |                |                |               |  |
|------------------------------------------------|----------|-------------|----------------|----------------|---------------|--|
| <b>group</b>                                   | <b>N</b> | <b>Mean</b> | <b>Minimum</b> | <b>Maximum</b> | <b>Median</b> |  |
| Surgery                                        | 3        | 2.18        | 0.75           | 3.31           | 2.48          |  |
| SBRT                                           | 6        | 0.90        | 0.42           | 1.63           | 0.91          |  |

4-4B).

| Summary of the # of Patients Regional Recurrence and # of Patients Regional Recurrence Free at Last Follow-up |                  |                             |                                                    |                                                    |
|---------------------------------------------------------------------------------------------------------------|------------------|-----------------------------|----------------------------------------------------|----------------------------------------------------|
| Group                                                                                                         | Total # Patients | Total # Regional Recurrence | Total # Regional Recurrence Free at Last Follow-up | Percent Regional Recurrence Free at Last Follow-up |
| SBRT                                                                                                          | 56               | 6                           | 50                                                 | 89.29                                              |
| Surgery                                                                                                       | 56               | 3                           | 53                                                 | 94.64                                              |
|                                                                                                               | 112              | 9                           | 103                                                | 91.96                                              |

4-4C).

| Group   | Year | Percent Regional Recurrence Free | 95% Confidence Interval |         |
|---------|------|----------------------------------|-------------------------|---------|
| SBRT    | 1    | 0.89715                          | 0.77003                 | 0.95592 |
| SBRT    | 2    | 0.86511                          | 0.71924                 | 0.93827 |
| SBRT    | 3    | 0.86511                          | 0.71924                 | 0.93827 |
| SBRT    | 4    | 0.86511                          | 0.71924                 | 0.93827 |
| SBRT    | 5    | 0.86511                          | 0.71924                 | 0.93827 |
| Surgery | 1    | 0.97872                          | 0.85840                 | 0.99698 |
| Surgery | 2    | 0.97872                          | 0.85840                 | 0.99698 |
| Surgery | 3    | 0.94610                          | 0.79511                 | 0.98670 |
| Surgery | 4    | 0.91348                          | 0.75036                 | 0.97189 |
| Surgery | 5    | 0.91348                          | 0.75036                 | 0.97189 |

4-5A). Distant recurrence is defined as having distant recurrence or censored at any other recurrences or the last follow-up. Distant recurrence free survival is defined as the time from DOS to date of recurrence or last follow-up.

For the patients who have distant recurrence only,

| From DOS to distant recurrence (years) |  |    |      |         |         |        |
|----------------------------------------|--|----|------|---------|---------|--------|
| group                                  |  | N  | Mean | Minimum | Maximum | Median |
| Surgery                                |  | 10 | 1.54 | 0.14    | 5.54    | 0.69   |
| SBRT                                   |  | 7  | 1.70 | 0.23    | 3.55    | 1.11   |

4-5B).

| <b>Summary of the # of Patients Distant Recurrence and # of Patients Distant Recurrence Free at Last Follow-up</b> |                         |                                   |                                                          |                                                          |
|--------------------------------------------------------------------------------------------------------------------|-------------------------|-----------------------------------|----------------------------------------------------------|----------------------------------------------------------|
| <b>Group</b>                                                                                                       | <b>Total # Patients</b> | <b>Total # Distant Recurrence</b> | <b>Total # Distant Recurrence Free at Last Follow-up</b> | <b>Percent Distant Recurrence Free at Last Follow-up</b> |
| SBRT                                                                                                               | 56                      | 7                                 | 49                                                       | 87.50                                                    |
| Surgery                                                                                                            | 56                      | 10                                | 46                                                       | 82.14                                                    |
|                                                                                                                    | 112                     | 17                                | 95                                                       | 84.82                                                    |

4-5C).

| <b>Group</b> | <b>Year</b> | <b>Percent Distant Recurrence Free</b> | <b>95% Confidence Interval</b> |         |
|--------------|-------------|----------------------------------------|--------------------------------|---------|
| SBRT         | 1           | 0.94505                                | 0.83914                        | 0.98195 |
| SBRT         | 2           | 0.91880                                | 0.79472                        | 0.96927 |
| SBRT         | 3           | 0.86138                                | 0.66122                        | 0.94759 |
| SBRT         | 4           | 0.67833                                | 0.36853                        | 0.85993 |
| SBRT         | 5           | 0.67833                                | 0.36853                        | 0.85993 |
| Surgery      | 1           | 0.86875                                | 0.74415                        | 0.93521 |
| Surgery      | 2           | 0.86875                                | 0.74415                        | 0.93521 |
| Surgery      | 3           | 0.84073                                | 0.70348                        | 0.91798 |
| Surgery      | 4           | 0.81070                                | 0.66199                        | 0.89874 |
| Surgery      | 5           | 0.81070                                | 0.66199                        | 0.89874 |

Online supplement, Appendix 1.

Appendix 1. Adult Comorbidity Evaluation-27

Identify the important medical comorbidities and grade severity using the index. Overall comorbidity Score is defined according to the highest ranked single ailment, except in the case where two or more Grade 2 ailments occur in different organ systems. In this situation, the overall comorbidity score should be designated Grade 3.

| Cogent comorbid ailment          | Grade 3                                                                                                                                                                                                            | Grade 2                                                                                                                                                                                         | Grade 1                                                                                                                                                                                   |
|----------------------------------|--------------------------------------------------------------------------------------------------------------------------------------------------------------------------------------------------------------------|-------------------------------------------------------------------------------------------------------------------------------------------------------------------------------------------------|-------------------------------------------------------------------------------------------------------------------------------------------------------------------------------------------|
| <b>Cardiovascular System</b>     |                                                                                                                                                                                                                    |                                                                                                                                                                                                 |                                                                                                                                                                                           |
| Myocardial Infarct               | <input type="radio"/> MI $\leq$ 6 months                                                                                                                                                                           | <input type="radio"/> MI $>$ 6 months ago                                                                                                                                                       | <input type="radio"/> MI by ECG only, age undetermined                                                                                                                                    |
| Angina / Coronary Artery Disease | <input type="radio"/> Unstable angina                                                                                                                                                                              | <input type="radio"/> Chronic exertional angina<br><input type="radio"/> Recent ( $\leq$ 6 months) Coronary Artery Bypass Graft (CABG) or Percutaneous Transluminal Coronary Angioplasty (PTCA) | <input type="radio"/> ECG or stress test evidence or catheterization evidence of coronary disease without symptoms<br><input type="radio"/> Angina pectoris not requiring hospitalization |
| Congestive Heart Failure (CHF)   | <input type="radio"/> Hospitalized for CHF within past 6 months<br><input type="radio"/> Ejection fraction $<$ 20%                                                                                                 | <input type="radio"/> Hospitalized for CHF $>$ 6 months prior<br><input type="radio"/> CHF with dyspnea which limits activities                                                                 | <input type="radio"/> CHF with dyspnea which has responded to treatment<br><input type="radio"/> Exertional dyspnea                                                                       |
| Arrhythmias                      | <input type="radio"/> Ventricular arrhythmia $\leq$ 6 months                                                                                                                                                       | <input type="radio"/> Ventricular arrhythmia $>$ 6 months<br><input type="radio"/> Chronic atrial fibrillation or flutter                                                                       | <input type="radio"/> Sick Sinus Syndrome<br><input type="radio"/> Supraventricular tachycardia                                                                                           |
| Hypertension                     | <input type="radio"/> DBP $\geq$ 130 mm Hg<br><input type="radio"/> Severe malignant papilledema or other eye changes                                                                                              | <input type="radio"/> DBP 115-129 mm Hg<br><input type="radio"/> DBP 90-114 mm Hg while taking antihypertensive medications                                                                     | <input type="radio"/> DBP 90-114 mm Hg while <u>not</u> taking antihypertensive medications<br><input type="radio"/> DBP $<$ 90 mm Hg while taking antihypertensive medications           |
| Venous Disease                   | <input type="radio"/> Recent PE ( $\leq$ 6 mos.)<br><input type="radio"/> Use of venous filter for PE's                                                                                                            | <input type="radio"/> DVT controlled with Coumadin or heparin                                                                                                                                   | <input type="radio"/> Old DVT no longer treated with Coumadin or Heparin                                                                                                                  |
| Peripheral Arterial Disease      | <input type="radio"/> Bypass or amputation for gangrene or arterial insufficiency $<$ 6 months ago<br><input type="radio"/> Untreated thoracic or abdominal aneurysm ( $\geq$ 6 cm)                                | <input type="radio"/> Bypass or amputation for gangrene or arterial insufficiency $>$ 6 months ago<br><input type="radio"/> Chronic insufficiency                                               | <input type="radio"/> Intermittent claudication<br><input type="radio"/> Untreated thoracic or abdominal aneurysm ( $<$ 6 cm)                                                             |
| <b>Respiratory System</b>        |                                                                                                                                                                                                                    |                                                                                                                                                                                                 |                                                                                                                                                                                           |
|                                  | <input type="radio"/> Marked pulmonary insufficiency<br><input type="radio"/> Restrictive Lung Disease or COPD with dyspnea at rest despite treatment<br><input type="radio"/> Chronic supplemental O <sub>2</sub> | <input type="radio"/> Restrictive Lung Disease or COPD (chronic bronchitis, emphysema, or asthma) with dyspnea which limits activities<br><input type="radio"/> FEV1 (51%-65%)                  | <input type="radio"/> Restrictive Lung Disease or COPD (chronic bronchitis, emphysema, or asthma) with dyspnea which has responded to treatment<br><input type="radio"/> FEV1 (66%-80%)   |
| <b>Gastrointestinal System</b>   |                                                                                                                                                                                                                    |                                                                                                                                                                                                 |                                                                                                                                                                                           |

|                                                                                                                                           |                                                                                                                                                                                                    |                                                                                                                                                                                 |                                                                                                                                                                                                          |
|-------------------------------------------------------------------------------------------------------------------------------------------|----------------------------------------------------------------------------------------------------------------------------------------------------------------------------------------------------|---------------------------------------------------------------------------------------------------------------------------------------------------------------------------------|----------------------------------------------------------------------------------------------------------------------------------------------------------------------------------------------------------|
| Hepatic                                                                                                                                   | <input type="radio"/> Portal hypertension and/or esophageal bleeding $\leq$ 6 mos. (Encephalopathy, Ascites, Jaundice with Total Bilirubin $>$ 2)                                                  | <input type="radio"/> Chronic hepatitis, cirrhosis, portal hypertension with moderate symptoms "compensated hepatic failure"                                                    | <input type="radio"/> Chronic hepatitis or cirrhosis without portal hypertension<br><input type="radio"/> Acute hepatitis without cirrhosis<br><input type="radio"/> Chronic liver disease manifested on |
| Stomach / Intestine                                                                                                                       | <input type="radio"/> Recent ulcers ( $\leq$ 6 months ago) requiring blood transfusion                                                                                                             | <input type="radio"/> Ulcers requiring surgery or transfusion $>$ 6 months ago                                                                                                  | <input type="radio"/> Diagnosis of ulcers treated with meds<br><input type="radio"/> Chronic malabsorption syndrome<br><input type="radio"/> Inflammatory bowel disease (IBD) on                         |
| Pancreas                                                                                                                                  | <input type="radio"/> Acute or chronic pancreatitis with major complications (phlegmon, abscess, or pseudocyst)                                                                                    | <input type="radio"/> Uncomplicated acute pancreatitis<br><input type="radio"/> Chronic pancreatitis with minor complications (malabsorption, impaired glucose tolerance, or GI | <input type="radio"/> Chronic pancreatitis w/o complications                                                                                                                                             |
| <b>Renal System</b>                                                                                                                       |                                                                                                                                                                                                    |                                                                                                                                                                                 |                                                                                                                                                                                                          |
| End-stage renal disease                                                                                                                   | <input type="radio"/> Creatinine $>$ 3 mg% with multi-organ failure, shock, or sepsis                                                                                                              | <input type="radio"/> Chronic Renal Insufficiency with creatinine $>$ 3 mg%                                                                                                     | <input type="radio"/> Chronic Renal Insufficiency with creatinine 2-3 mg%.                                                                                                                               |
| <b>Endocrine System (Code the comorbid ailments with the (*) in both the Endocrine system and other organ systems if applicable)</b>      |                                                                                                                                                                                                    |                                                                                                                                                                                 |                                                                                                                                                                                                          |
| Diabetes Mellitus                                                                                                                         | <input type="radio"/> Hospitalization $\leq$ 6 months for DKA<br><input type="radio"/> Diabetes causing end-organ failure<br><input type="radio"/> retinopathy<br><input type="radio"/> neuropathy | <input type="radio"/> IDDM without complications<br><input type="radio"/> Poorly controlled AODM with oral agents                                                               | <input type="radio"/> AODM controlled by oral agents only                                                                                                                                                |
| <b>Neurological System</b>                                                                                                                |                                                                                                                                                                                                    |                                                                                                                                                                                 |                                                                                                                                                                                                          |
| Stroke                                                                                                                                    | <input type="radio"/> Acute stroke with significant neurologic deficit                                                                                                                             | <input type="radio"/> Old stroke with neurologic residual                                                                                                                       | <input type="radio"/> Stroke with no residual                                                                                                                                                            |
| Dementia                                                                                                                                  | <input type="radio"/> Severe dementia requiring full support for activities of daily living                                                                                                        | <input type="radio"/> Moderate dementia (not completely self-sufficient, needs                                                                                                  | <input type="radio"/> Mild dementia (can take care of self)                                                                                                                                              |
| Paralysis                                                                                                                                 | <input type="radio"/> Paraplegia or hemiplegia requiring full support for activities of daily living                                                                                               | <input type="radio"/> Paraplegia or hemiplegia requiring wheelchair, able to do some self care                                                                                  | <input type="radio"/> Paraplegia or hemiplegia, ambulatory and providing most of                                                                                                                         |
| Neuromuscular                                                                                                                             | <input type="radio"/> MS, Parkinson's, Myasthenia Gravis, or other chronic neuromuscular disorder and requiring full support for activities of daily living                                        | <input type="radio"/> MS, Parkinson's, Myasthenia Gravis, or other chronic neuromuscular disorder, but able to do some self care                                                | <input type="radio"/> MS, Parkinson's, Myasthenia Gravis, or other chronic neuromuscular disorder, but ambulatory and providing most of self care                                                        |
| <b>Psychiatric</b>                                                                                                                        |                                                                                                                                                                                                    |                                                                                                                                                                                 |                                                                                                                                                                                                          |
|                                                                                                                                           | <input type="radio"/> Recent suicidal attempt<br><input type="radio"/> Active schizophrenia                                                                                                        | <input type="radio"/> Depression or bipolar disorder uncontrolled                                                                                                               | <input type="radio"/> Depression or bipolar disorder controlled w/ medication                                                                                                                            |
| <b>Rheumatologic (Incl. Rheumatoid Arthritis, Systemic Lupus, Mixed Connective Tissue Disorder, Polymyositis, Rheumatic Polymyositis)</b> |                                                                                                                                                                                                    |                                                                                                                                                                                 |                                                                                                                                                                                                          |
|                                                                                                                                           | <input type="radio"/> Connective Tissue Disorder with secondary end-organ failure (renal, cardiac, CNS)                                                                                            | <input type="radio"/> Connective Tissue Disorder on steroids or immunosuppressant                                                                                               | <input type="radio"/> Connective Tissue Disorder on NSAIDs or no treatment                                                                                                                               |
| <b>Immunological System (AIDS should not be considered a comorbidity for Kaposi's Sarcoma or Non-Hodgkin's Lymphoma)</b>                  |                                                                                                                                                                                                    |                                                                                                                                                                                 |                                                                                                                                                                                                          |
| AIDS                                                                                                                                      | <input type="radio"/> Fulminant AIDS w/KS, MAI, PCP (AIDS defining illness)                                                                                                                        | <input type="radio"/> HIV+ with h/o defining illness. CD4 <sup>+</sup> $<$ 200/ $\mu$ L                                                                                         | <input type="radio"/> Asymptomatic HIV+ patient.<br><input type="radio"/> HIV <sup>+</sup> w/o h/o AIDS defining illness.                                                                                |
| <b>Malignancy (Excluding Cutaneous Basal Cell Ca., Cutaneous SCCA, Carcinoma in-situ, and Intraepithelial Neoplasm)</b>                   |                                                                                                                                                                                                    |                                                                                                                                                                                 |                                                                                                                                                                                                          |

|                                                                                              |                                                                                                        |                                                                                                                     |                                                                                                                                   |
|----------------------------------------------------------------------------------------------|--------------------------------------------------------------------------------------------------------|---------------------------------------------------------------------------------------------------------------------|-----------------------------------------------------------------------------------------------------------------------------------|
| Solid Tumor including melanoma                                                               | <input type="radio"/> Uncontrolled cancer<br><input type="radio"/> Newly diagnosed but not yet treated | <input type="radio"/> Any controlled solid tumor without documented metastases, but initially diagnosed and treated | <input type="radio"/> Any controlled solid tumor without documented metastases, but initially diagnosed and treated > 5 years ago |
| Leukemia and                                                                                 | <input type="radio"/> Relapse                                                                          | <input type="radio"/> 1 <sup>st</sup> remission or new dx <1yr                                                      | <input type="radio"/> H/o leukemia or myeloma with last                                                                           |
| Lymphoma                                                                                     | <input type="radio"/> Relapse                                                                          | <input type="radio"/> 1 <sup>st</sup> remission or new dx <1yr                                                      | <input type="radio"/> H/o lymphoma w/ last Rx >1 yr prior                                                                         |
| <b>Substance Abuse</b> (Must be accompanied by social, behavioral, or medical complications) |                                                                                                        |                                                                                                                     |                                                                                                                                   |
| Alcohol                                                                                      | <input type="radio"/> Delirium tremens                                                                 | <input type="radio"/> Active alcohol abuse with social, behavioral, or medical complications                        | <input type="radio"/> H/o alcohol abuse but not presently drinking                                                                |
| Illicit Drugs                                                                                | <input type="radio"/> Acute Withdrawal Syndrome                                                        | <input type="radio"/> Active substance abuse with social, behavioral, or medical complications                      | <input type="radio"/> H/o substance abuse but not presently using                                                                 |
| <b>Body Weight</b>                                                                           |                                                                                                        |                                                                                                                     |                                                                                                                                   |
| Obesity                                                                                      |                                                                                                        | <input type="radio"/> Morbid (i.e., BMI ≥ 38)                                                                       |                                                                                                                                   |

OVERALL COMORBIDITY SCORE (Circle one.)

0  
None1  
Mild2  
Moderate3  
Severe9  
Unknown
